# Supplementary material for: Nucleotide Weight Matrices Reveal Ubiquitous Mutational Footprints of AID/APOBEC Deaminases in Human Cancer Genomes
Source: PubMed Central journal article supplement (PMC6406962; doi:10.3390/cancers11020211), 2019-02-12

## Supplementary Materials

### Nucleotide weight matrices reveal ubiquitous mutational footprints of AID/APOBEC deaminases in human cancer genomes

Igor B. Rogozin, Abiel Roche-Lima, Artem G. Lada, Frida Belinky, Ivan A. Sidorenko, Galina V. Glazko, Vladimir N. Babenko, David N. Cooper, Yuri I. Pavlov

**Abbreviations:** APO1 = APOBEC1, APO3A = APOBEC3A, APO3B = APOBEC3B, APO3C = APOBEC3C, APO3G = APOBEC3G, AID = Activation Induced Deaminase

**Supplementary Table S1.** Datasets of mutations induced by over-expression of AID/APOBEC enzymes in the yeast genome.

| Enzyme | Number of mutations (sites) | Lada et al., 2011 | Taylor et al., 2013 | Lada et al., 2015 | Lada et al., 2017 |
|--------|-----------------------------|-------------------|---------------------|-------------------|-------------------|
| APO1   | 673                         | -                 | +                   | +                 | +                 |
| APO3A  | 723                         | -                 | +                   | -                 | -                 |
| APO3B  | 745                         | -                 | +                   | -                 | -                 |
| APO3C  | 67                          | -                 | +                   | -                 | -                 |
| APO3G  | 1147                        | +                 | +                   | +                 | +                 |
| AID    | 397                         | -                 | +                   | +                 | +                 |

#### References:

Lada A.G., Krick C.F., Kozmin S.G., Mayorov V.I., Karpova T.S., Rogozin I.B., Pavlov Y.I. (2011) Mutator effects and mutation signatures of editing deaminases produced in bacteria and yeast. *Biochemistry (Mosc.)*, 76: 131-146.

Taylor BJ, Nik-Zainal S, Wu YL, Stebbings LA, Raine K, Campbell PJ, Rada C, Stratton MR, Neuberger MS. (2013) DNA deaminases induce break-associated mutation showers with implication of APOBEC3B and 3A in breast cancer kataegis. *Elife* 2: e00534.

Lada A.G., Kliver S.F., Dhar A., Plev D., Masharsky A., Rogozin I.B., Pavlov Y.I. (2015) Disruption of transcriptional coactivator Sub1 leads to genome-wide re-distribution of clustered mutations induced by APOBEC in active yeast genes. *PLoS Genet.* 11: e1005217.

Lada A.G., Stephenkova E.I., Zhuk A.S., Kliver S.F., Rogozin I.B., Plev D., Dhar A., Pavlov Y.I. (2017) Recombination is responsible for the increased recovery of drug-resistant mutants with hypermutated genomes in resting yeast diploids expressing APOBEC deaminases. *Front. Genet.* 8: 202.

**Supplementary Table S2.** Control study: correlation between AID/APOBEC mutable motifs and the context of somatic mutations in C:G sites in mitochondrial DNA.

| Cancer tissue type | #Mutations | Test                               | APO1        | APO3A                 | APO3B                 | APO3C       | APO3G       | AID                   |
|--------------------|------------|------------------------------------|-------------|-----------------------|-----------------------|-------------|-------------|-----------------------|
| Bladder            | 39         | Ratio<br><i>t</i> -test<br>MC test | .912<br>NSE | .913<br>NSE           | .908<br>NSE           | .958<br>NSE | .897<br>NSE | .937<br>NSE           |
| Blood              | 66         | Ratio<br><i>t</i> -test<br>MC test | .887<br>NSE | .917<br>NSE           | .907<br>NSE           | .902<br>NSE | .912<br>NSE | .901<br>NSE           |
| Brain              | 4          | Ratio<br><i>t</i> -test<br>MC test | .901<br>NSE | 1.018<br>NSE<br>0.089 | 1.028<br>NSE<br>0.031 | .923<br>NSE | .985<br>NSE | 1.007<br>NSE<br>0.342 |
| Breast             | 283        | Ratio<br><i>t</i> -test<br>MC test | .918<br>NSE | .932<br>NSE           | .925<br>NSE           | .946<br>NSE | .932<br>NSE | .912<br>NSE           |
| Cervix             | 22         | Ratio<br><i>t</i> -test<br>MC test | .935<br>NSE | .901<br>NSE           | .927<br>NSE           | .946<br>NSE | .866<br>NSE | .875<br>NSE           |
| Colon              | 81         | Ratio<br><i>t</i> -test<br>MC test | .892<br>NSE | .904<br>NSE           | .898<br>NSE           | .913<br>NSE | .886<br>NSE | .906<br>NSE           |
| Kidney             | 7          | Ratio<br><i>t</i> -test<br>MC test | .917<br>NSE | .864<br>NSE           | .911<br>NSE           | .971<br>NSE | .931<br>NSE | .901<br>NSE           |
| Liver              | 49         | Ratio<br><i>t</i> -test<br>MC test | .818<br>NSE | .849<br>NSE           | .828<br>NSE           | .880<br>NSE | .833<br>NSE | .881<br>NSE           |
| Lung               | 55         | Ratio<br><i>t</i> -test<br>MC test | .930<br>NSE | .954<br>NSE           | .929<br>NSE           | .976<br>NSE | .987<br>NSE | .904<br>NSE           |
| Ovary              | 34         | Ratio<br><i>t</i> -test<br>MC test | .889<br>NSE | .883<br>NSE           | .858<br>NSE           | .923<br>NSE | .827<br>NSE | .857<br>NSE           |
| Prostate           | 79         | Ratio<br><i>t</i> -test<br>MC test | .927<br>NSE | .916<br>NSE           | .930<br>NSE           | .965<br>NSE | .938<br>NSE | .937<br>NSE           |

|         |    |                                    |             |             |             |             |             |             |
|---------|----|------------------------------------|-------------|-------------|-------------|-------------|-------------|-------------|
| Skin    | 16 | Ratio<br><i>t</i> -test<br>MC test | .867<br>NSE | .836<br>NSE | .871<br>NSE | .904<br>NSE | .878<br>NSE | .901<br>NSE |
| Stomach | 23 | Ratio<br><i>t</i> -test<br>MC test | .824<br>NSE | .867<br>NSE | .873<br>NSE | .939<br>NSE | .947<br>NSE | .938<br>NSE |
| Uterus  | 40 | Ratio<br><i>t</i> -test<br>MC test | .966<br>NSE | .979<br>NSE | .972<br>NSE | .946<br>NSE | .971<br>NSE | .867<br>NSE |

NSE indicates absence of significant excess of mutations in AID/APOBEC mutable motifs (NSE, no significant excess) suggesting that there is no association between mutagenesis and motifs. The correlation was measured using Student *t*-test and Monte Carlo (MC) tests. The asterisk denotes that the corresponding  $P < 0.0005$  (critical value = 3.291) is a conservative estimate of the critical overall value of the *t*-test taking into account the Bonferroni correction for multiple testing ( $16 \times 6 = 96$ ). “Ratio” is the mean weight of mutated sites divided by the mean weight of non-mutated sites. Results of the MC test are shown for cases where the Ratio  $> 1$  (shown in green).

**Supplementary Table S3.** Control study: fractions of random matrices with a significant correlation between AID/APOBEC pseudo-mutable motifs (shuffled sites of mutations) and the context of somatic mutations [IGOR: at?] C:G sites.

| Cancer tissue type | #Mutations | APO1        | APO3A       | APO3B       | APO3C       | APO3G | AID         |
|--------------------|------------|-------------|-------------|-------------|-------------|-------|-------------|
| Bladder            | 38750      | 0.          | 0.          | 0.          | 0.          | 0.    | 0.          |
| Blood              | 10633      | 0.          | 0.          | 0.          | 0.          | 0.    | 0.          |
| Brain              | 30926      | 0.          | 0.          | 0.          | 0.04        | 0.    | 0.03        |
| Breast             | 48035      | 0.          | 0.          | 0.          | 0.          | 0.    | 0.          |
| Cervix             | 41454      | 0.          | 0.          | 0.          | 0.          | 0.    | 0.          |
| Colon              | 175109     | 0.          | 0.03        | <b>0.12</b> | <b>0.21</b> | 0.    | <b>0.35</b> |
| Kidney             | 32382      | 0.          | 0.          | 0.          | 0.          | 0.    | 0.          |
| Liver              | 74161      | 0.          | 0.          | 0.          | 0.01        | 0.    | 0.          |
| Lung               | 180284     | 0.          | 0.          | 0.          | 0.          | 0.    | 0.          |
| Ovary              | 22340      | 0.          | 0.          | 0.          | 0.          | 0.    | 0.          |
| Pancreas           | 35165      | 0.          | 0.          | 0.          | 0.03        | 0.    | 0.          |
| Prostate           | 16703      | 0.          | 0.          | 0.          | <b>0.30</b> | 0.    | 0.          |
| Rectum             | 30018      | 0.          | 0.03        | <b>0.18</b> | 0.          | 0.    | <b>0.17</b> |
| Skin               | 244248     | <b>0.81</b> | <b>0.33</b> | 0.          | <b>0.96</b> | 0.    | 0.          |
| Stomach            | 115652     | 0.          | 0.          | <b>0.15</b> | <b>0.15</b> | 0.    | <b>0.19</b> |
| Uterus             | 55999      | 0.          | 0.          | 0.          | 0.09        | 0.    | 0.          |

The significance of the excess of somatic mutations observed in a pseudo-mutable context was measured using the Student *t*-test and Monte Carlo (MC) tests (see Materials and Methods for details). The threshold value was corrected using the conservative Bonferroni correction for multiple testing (16 tissues x 6 mutable contexts = 96,  $P < 0.0005$ , critical *t*-test value = 3.291). The expected false discovery rate should be around 0.05, large fraction values ( $>0.10$ ) are shown in green.

**Supplementary Table S4.** Control study: fraction of random matrices with a significant correlation between AID/APOBEC pseudo-mutable motifs (randomly sampled sites from the yeast genome) and the context of somatic mutations at C:G sites.

| Cancer tissue type                                                                                                                              | #Mutations | APO1        | APO3A       | APO3B       | APO3C       | APO3G       | AID         |
|-------------------------------------------------------------------------------------------------------------------------------------------------|------------|-------------|-------------|-------------|-------------|-------------|-------------|
| <i>All somatic mutations</i>                                                                                                                    |            |             |             |             |             |             |             |
| Bladder                                                                                                                                         | 38750      | <b>0.65</b> | <b>0.46</b> | <b>0.56</b> | <b>0.57</b> | <b>0.64</b> | <b>0.50</b> |
| Blood                                                                                                                                           | 10633      | <b>0.19</b> | 0.04        | 0.          | <b>0.16</b> | 0.01        | 0.          |
| Brain                                                                                                                                           | 30926      | 0.          | 0.02        | 0.          | <b>0.17</b> | 0.01        | 0.01        |
| Breast                                                                                                                                          | 48035      | 0.          | 0.07        | 0.          | <b>0.35</b> | <b>0.10</b> | <b>0.21</b> |
| Cervix                                                                                                                                          | 41454      | <b>0.70</b> | <b>0.56</b> | <b>0.64</b> | <b>0.58</b> | <b>0.73</b> | <b>0.61</b> |
| Colon                                                                                                                                           | 175109     | 0.          | 0.04        | 0.02        | <b>0.25</b> | 0.          | 0.          |
| Kidney                                                                                                                                          | 32382      | 0.          | 0.02        | 0.01        | <b>0.18</b> | 0.01        | 0.02        |
| Liver                                                                                                                                           | 74161      | 0.          | 0.04        | 0.01        | <b>0.16</b> | 0.01        | 0.          |
| Lung                                                                                                                                            | 180284     | 0.07        | 0.02        | 0.04        | <b>0.29</b> | 0.01        | 0.09        |
| Ovary                                                                                                                                           | 22340      | 0.          | 0.02        | 0.01        | <b>0.15</b> | 0.01        | 0.          |
| Pancreas                                                                                                                                        | 35165      | 0.01        | 0.04        | 0.02        | <b>0.20</b> | 0.01        | 0.01        |
| Prostate                                                                                                                                        | 16703      | 0.01        | 0.03        | 0.02        | <b>0.23</b> | 0.01        | 0.          |
| Rectum                                                                                                                                          | 30018      | 0.01        | 0.04        | 0.02        | <b>0.19</b> | 0.02        | 0.02        |
| Skin                                                                                                                                            | 244248     | <b>0.79</b> | <b>0.72</b> | <b>0.80</b> | <b>0.63</b> | <b>0.84</b> | <b>0.70</b> |
| Stomach                                                                                                                                         | 115652     | 0.          | 0.04        | 0.01        | <b>0.24</b> | 0.01        | 0.03        |
| Uterus                                                                                                                                          | 55999      | 0.01        | 0.04        | 0.02        | <b>0.22</b> | 0.02        | 0.02        |
| <i>Somatic mutations with a C:G-rich DNA context (<math>\geq 50\%</math> C+G in the 10 nucleotide region around sites of somatic mutations)</i> |            |             |             |             |             |             |             |
| Bladder                                                                                                                                         | 38750      | <b>0.42</b> | <b>0.28</b> | <b>0.30</b> | <b>0.47</b> | <b>0.32</b> | <b>0.41</b> |
| Cervix                                                                                                                                          | 41454      | <b>0.46</b> | <b>0.29</b> | <b>0.37</b> | <b>0.40</b> | <b>0.39</b> | <b>0.48</b> |
| Skin                                                                                                                                            | 244248     | <b>0.74</b> | <b>0.66</b> | <b>0.71</b> | <b>0.57</b> | <b>0.75</b> | <b>0.71</b> |

The significance of the excess of somatic mutations observed in a pseudo-mutable context was measured using the Student *t*-test and Monte Carlo (MC) tests (see Materials and Methods for details). The threshold value was corrected using the conservative Bonferroni correction for multiple testing (16 tissues x 6 mutable contexts = 96,  $P < 0.0005$ , critical *t*-test value = 3.291). The expected false discovery rate should be around 0.05, large fraction values ( $>0.10$ ) are shown in green.

**Supplementary Table S5.** Nucleotide composition of the DNA context of somatic mutations ( $\pm 3$  nucleotides).

|                | A           | T           | G           | C           |
|----------------|-------------|-------------|-------------|-------------|
| <b>Bladder</b> | <b>.212</b> | <b>.328</b> | <b>.212</b> | <b>.248</b> |
| Blood          | .230        | .224        | .294        | .252        |
| Brain          | .224        | .213        | .311        | .252        |
| Breast         | .221        | .300        | .234        | .245        |
| <b>Cervix</b>  | <b>.206</b> | <b>.350</b> | <b>.200</b> | <b>.244</b> |
| Colon          | .196        | .239        | .328        | .237        |
| Kidney         | .231        | .255        | .251        | .263        |
| Liver          | .215        | .236        | .268        | .281        |
| Lung           | .222        | .254        | .246        | .278        |
| Ovary          | .234        | .244        | .262        | .259        |
| Pancreas       | .214        | .225        | .309        | .252        |
| Prostate       | .207        | .215        | .296        | .281        |
| Rectum         | .207        | .278        | .294        | .221        |
| <b>Skin</b>    | <b>.177</b> | <b>.356</b> | <b>.175</b> | <b>.293</b> |
| Stomach        | .198        | .219        | .342        | .242        |
| Uterus         | .209        | .269        | .306        | .217        |

Sites with mutations in G nucleotides were converted to the complementary strand

**Supplementary Table S6.** Correlation between AID/APOBEC mutable motifs and the context of C:G > T:A somatic mutations.

| Cancer tissue type | #Mutations | Test           | APO1    | APO3A   | APO3B   | APO3C  | APO3G  | AID    |
|--------------------|------------|----------------|---------|---------|---------|--------|--------|--------|
| Bladder            | 23127      | Ratio          | 1.487*  | 1.463*  | 1.461*  | 1.179* | 1.101* | 1.051* |
|                    |            | <i>t</i> -test | 112.845 | 134.038 | 120.517 | 71.132 | 41.798 | 21.415 |
|                    |            | MC test        | <0.001  | <0.001  | <0.001  | <0.001 | <0.001 | <0.001 |
|                    |            | Fraction       | .657    |         | .627    | .138   | .921   | .500   |
| Blood              | 6331       | Ratio          | .946    | 1.026*  | .978    | 1.021* | 1.009  | 1.065* |
|                    |            | <i>t</i> -test | NSE     | 4.330   | NSE     | 4.356  | NSE    | 12.015 |
|                    |            | MC test        |         | <0.001  |         | <0.001 |        | <0.001 |
|                    |            | Fraction       |         | .190    |         | .195   |        |        |
| Brain              | 23354      | Ratio          | .855    | .975    | .888    | .992   | .960   | 1.063* |
|                    |            | <i>t</i> -test | NSE     | NSE     | NSE     | NSE    | NSE    | 21.831 |
|                    |            | MC test        |         |         |         |        |        | <0.001 |
|                    |            | Fraction       |         |         |         |        |        |        |
| Breast             | 10327      | Ratio          | 1.233*  | 1.261*  | 1.231*  | 1.098* | 1.039* | 1.050* |
|                    |            | <i>t</i> -test | 34.183  | 48.309  | 37.605  | 25.377 | 9.677  | 12.992 |
|                    |            | MC test        | <0.001  | <0.001  | <0.001  | <0.001 | <0.001 | <0.001 |
|                    |            | Fraction       | .476    |         |         | .123   | .866   |        |
| Cervix             | 23034      | Ratio          | 1.573*  | 1.542*  | 1.538*1 | 1.207* | 1.113* | 1.060* |
|                    |            | <i>t</i> -test | 138.455 | 168.841 | 50.422  | 82.775 | 49.688 | 25.686 |
|                    |            | MC test        | <0.001  | <0.001  | <0.001  | <0.001 | <0.001 | <0.001 |
|                    |            | Fraction       | .737    |         | .707    | .165   | .165   | .339   |
| Colon              | 132513     | Ratio          | .838    | 1.003   | .893    | .989   | .916   | 1.080* |
|                    |            | <i>t</i> -test | NSE     | NSE     | NSE     | NSE    | NSE    | 65.985 |
|                    |            | MC test        |         |         |         |        |        | <0.001 |
|                    |            | Fraction       |         |         |         |        |        |        |
| Kidney             | 16690      | Ratio          | .972    | 1.024*  | .995    | 1.020* | .989   | 1.039* |
|                    |            | <i>t</i> -test | NSE     | 6.486   | NSE     | 6.899  | NSE    | 11.814 |
|                    |            | MC test        |         | <0.001  |         | <0.001 |        | <0.001 |
|                    |            | Fraction       |         | .230    |         | .215   |        |        |
| Liver              | 42221      | Ratio          | .915    | .968    | .946    | .997   | .998   | 1.014* |
|                    |            | <i>t</i> -test | NSE     | NSE     | NSE     | NSE    | NSE    | 6.400  |
|                    |            | MC test        |         |         |         |        |        | <0.001 |
|                    |            | Fraction       |         |         |         |        |        |        |
| Lung               | 58116      | Ratio          | 1.164*  | 1.179*  | 1.179*  | 1.077* | 1.078* | 1.014* |
|                    |            | <i>t</i> -test | 59.858  | 82.536  | 72.640  | 48.475 | 42.941 | 8.518  |
|                    |            | MC test        | <0.001  | <0.001  | <0.001  | <0.001 | <0.001 | <0.001 |
|                    |            | Fraction       | .393    |         |         | .091   | .815   |        |
| Ovary              | 10973      | Ratio          | .960    | 1.031*  | .990    | 1.012* | .992   | 1.041* |
|                    |            | <i>t</i> -test | NSE     | 6.851   | NSE     | 3.355  | NSE    | 9.813  |
|                    |            | MC test        |         | <0.001  |         | <0.001 |        | <0.001 |
|                    |            | Fraction       |         | .199    |         | .205   |        |        |
| Pancreas           | 25544      | Ratio          | .921    | 1.039*  | .966    | 1.010* | .977   | 1.058* |
|                    |            | <i>t</i> -test | NSE     | 13.290  | NSE     | 4.034  | NSE    | 21.396 |
|                    |            | MC test        |         | <0.001  |         | <0.001 |        | <0.001 |
|                    |            | Fraction       |         | .178    |         | .291   |        |        |

|          |        |                                                |                                     |                                    |                                     |                                     |                                     |                                    |
|----------|--------|------------------------------------------------|-------------------------------------|------------------------------------|-------------------------------------|-------------------------------------|-------------------------------------|------------------------------------|
| Prostate | 9506   | Ratio<br><i>t</i> -test<br>MC test<br>Fraction | .866<br>NSE                         | 1.001<br>NSE                       | .910<br>NSE                         | 1.013*<br>3.411<br><0.001<br>.230   | .962<br>NSE                         | 1.082*<br>18.442<br><0.001         |
| Rectum   | 20315  | Ratio<br><i>t</i> -test<br>MC test<br>Fraction | .956<br>NSE                         | 1.086*<br>24.646<br><0.001<br>.239 | 1.009<br>NSE                        | 1.028*<br>10.270<br><0.001          | .965<br>NSE                         | 1.076*<br>25.245<br><0.001         |
| Skin     | 230979 | Ratio<br><i>t</i> -test<br>MC test<br>Fraction | 1.438*<br>331.007<br><0.001<br>.617 | 1.333*3<br>00.669<br><0.001        | 1.402*3<br>69.514<br><0.001<br>.527 | 1.189*2<br>23.837<br><0.001<br>.281 | 1.148*<br>178.865<br><0.001<br>.980 | 1.038*<br>46.377<br><0.001<br>.667 |
| Stomach  | 92882  | Ratio<br><i>t</i> -test<br>MC test<br>Fraction | .799<br>NSE                         | .970<br>NSE                        | .859<br>NSE                         | .970<br>NSE                         | .901<br>NSE                         | 1.070*<br>48.316<br><0.001         |
| Uterus   | 41875  | Ratio<br><i>t</i> -test<br>MC test<br>Fraction | .931<br>NSE                         | 1.089*<br>35.553<br><0.001<br>.292 | .980<br>NSE                         | 1.046*<br>23.344<br><0.001          | .929<br>NSE                         | 1.107*<br>52.688<br><0.001         |

NSE means that No Significant Excess of mutable motifs was found. The significance of the observed excess was measured using the Student *t*-test and Monte Carlo (MC) tests. The asterisk denotes that the corresponding  $P < 0.0005$  (critical value = 3.291) is a conservative estimate of the critical overall value of the *t*-test taking into account the Bonferroni correction for multiple testing ( $16 \times 6 = 96$ ). “Ratio” is the mean weight of mutated sites divided by the mean weight of non-mutated sites. The predicted fraction of mutations induced by AID/APOBEC proteins (“Fraction”) is shown when the significant excess of somatic mutations in a mutable motif comparisons was detected; all cases where there was a significant difference between observed and expected distributions ( $P > 0.05$ ) were discarded.



**Supplementary Table S7.** Correlation between AID/APOBEC mutable motifs and the context of C:G > G:C somatic mutations.

| Cancer tissue type | #Mutations | Test           | APO1    | APO3A   | APO3B   | APO3C  | APO3G  | AID    |
|--------------------|------------|----------------|---------|---------|---------|--------|--------|--------|
| Bladder            | 11020      | Ratio          | 1.698*  | 1.575*  | 1.614*1 | 1.178* | 1.162* | 1.015* |
|                    |            | <i>t</i> -test | 146.887 | 149.530 | 53.222  | 58.002 | 55.175 | 4.832  |
|                    |            | MC test        | <0.001  | <0.001  | <0.001  | <0.001 | <0.001 | <0.001 |
|                    |            | Fraction       |         | .795    | .819    | .758   | .266   |        |
| Blood              | 2095       | Ratio          | .911    | .939    | .922    | .936   | .903   | 1.006  |
|                    |            | <i>t</i> -test | NSE     | NSE     | NSE     | NSE    | NSE    | NSE    |
|                    |            | MC test        |         |         |         |        |        |        |
|                    |            | Fraction       |         |         |         |        |        |        |
| Brain              | 3306       | Ratio          | 1.160*  | 1.101*  | 1.126*  | 1.036* | 1.013  | 1.033* |
|                    |            | <i>t</i> -test | 14.417  | 11.126  | 11.777  | 5.912  | NSE    | 4.534  |
|                    |            | MC test        | <0.001  | <0.001  | <0.001  | <0.001 |        | <0.001 |
|                    |            | Fraction       | .394    | .363    | <0.001  | .147   |        | .550   |
| Breast             | 22746      | Ratio          | 1.553*  | 1.451*  | 1.487*  | 1.138* | 1.111* | 1.019* |
|                    |            | <i>t</i> -test | 143.860 | 141.757 | 141.726 | 61.792 | 49.665 | 8.114  |
|                    |            | MC test        | <0.001  | <0.001  | <0.001  | <0.001 | <0.001 | <0.001 |
|                    |            | Fraction       |         | .718    | .733    | .109   | .193   | .234   |
| Cervix             | 12993      | Ratio          | 1.802*  | 1.667*  | 1.705*  | 1.214* | 1.174* | 1.033* |
|                    |            | <i>t</i> -test | 224.947 | 228.869 | 237.999 | 76.699 | 71.539 | 11.911 |
|                    |            | MC test        | <0.001  | <0.001  | <0.001  | <0.001 | <0.001 | <0.001 |
|                    |            | Fraction       |         | .872    | .915    | .648   | .308   |        |
| Colon              | 6336       | Ratio          | 1.080*  | 1.032*  | 1.039*  | .988   | .949   | 1.029* |
|                    |            | <i>t</i> -test | 9.495   | 4.781   | 5.040   | NSE    | NSE    | 5.476  |
|                    |            | MC test        | <0.001  | <0.001  | <0.001  |        |        | <0.001 |
|                    |            | Fraction       |         | .321    |         |        |        |        |
| Kidney             | 5867       | Ratio          | 1.129*  | 1.070*  | 1.114*  | 1.027* | 1.043* | 1.017  |
|                    |            | <i>t</i> -test | 15.831  | 10.701  | 15.046  | 6.015  | 7.853  | NSE    |
|                    |            | MC test        | <0.001  | <0.001  | <0.001  | <0.001 | <0.001 |        |
|                    |            | Fraction       | .380    | .334    |         | .153   |        |        |
| Liver              | 8314       | Ratio          | 1.142*  | 1.091*  | 1.126*  | 1.029* | 1.043* | 1.012  |
|                    |            | <i>t</i> -test | 20.167  | 16.430  | 19.542  | 7.435  | 8.894  | NSE    |
|                    |            | MC test        | <0.001  | <0.001  | <0.001  | <0.001 | <0.001 |        |
|                    |            | Fraction       | .368    | .329    |         | .129   |        |        |
| Lung               | 32118      | Ratio          | 1.289*  | 1.250*  | 1.273*  | 1.081* | 1.076* | 1.032* |
|                    |            | <i>t</i> -test | 78.368  | 86.746  | 82.654  | 41.739 | 33.698 | 14.806 |
|                    |            | MC test        | <0.001  | <0.001  | <0.001  | <0.001 | <0.001 | <0.001 |
|                    |            | Fraction       | .522    |         |         | .093   | .856   | .359   |
| Ovary              | 5609       | Ratio          | 1.153*  | 1.105*  | 1.131*  | 1.031* | 1.031* | 1.022* |
|                    |            | <i>t</i> -test | 17.649  | 15.263  | 16.282  | 6.634  | 5.451  | 3.928  |
|                    |            | MC test        | <0.001  | <0.001  | <0.001  | <0.001 | <0.001 | <0.001 |
|                    |            | Fraction       | .395    |         |         | .082   | .780   |        |
| Pancreas           | 3426       | Ratio          | 1.232*  | 1.158*  | 1.195*  | 1.049* | 1.032* | 1.024* |
|                    |            | <i>t</i> -test | 20.503  | 17.298  | 18.502  | 7.899  | 4.606  | 3.340  |
|                    |            | MC test        | <0.001  | <0.001  | <0.001  | <0.001 | <0.001 | 0.001  |
|                    |            | Fraction       | .448    | .405    |         | .103   | .716   |        |

|          |      |                |        |        |        |        |        |        |
|----------|------|----------------|--------|--------|--------|--------|--------|--------|
| Prostate | 1387 | Ratio          | 1.130* | 1.088* | 1.106* | 1.012  | 1.042* | .994   |
|          |      | <i>t</i> -test | 7.583  | 6.648  | 6.730  | NSE    | 3.587  | NSE    |
|          |      | MC test        | <0.001 | <0.001 | <0.001 |        | <0.001 |        |
|          |      | Fraction       | .396   | .327   |        |        | .839   |        |
| Rectum   | 1975 | Ratio          | 1.120* | 1.086* | 1.103* | 1.032* | .973   | 1.055* |
|          |      | <i>t</i> -test | 8.026  | 7.207  | 7.400  | 3.960  | NSE    | 6.052  |
|          |      | MC test        | <0.001 | <0.001 | <0.001 | <0.001 |        | <0.001 |
|          |      | Fraction       | .401   | .368   | .570   | .094   |        |        |
| Skin     | 5027 | Ratio          | 1.141* | 1.099* | 1.135* | 1.032* | 1.075* | .999   |
|          |      | <i>t</i> -test | 15.681 | 14.045 | 16.676 | 6.394  | 11.708 | NSE    |
|          |      | MC test        | <0.001 | <0.001 | <0.001 | <0.001 | <0.001 |        |
|          |      | Fraction       | .364   |        |        | .115   |        |        |
| Stomach  | 4960 | Ratio          | 1.120* | 1.061* | 1.075* | .993   | .954   | 1.018  |
|          |      | <i>t</i> -test | 12.627 | 8.030  | 8.504  | NSE    | NSE    | NSE    |
|          |      | MC test        | <0.001 | <0.001 | <0.001 |        |        |        |
|          |      | Fraction       | .390   | .349   | .558   |        |        |        |
| Uterus   | 2221 | Ratio          | 1.210* | 1.158* | 1.163* | 1.035* | 1.011  | 1.023  |
|          |      | <i>t</i> -test | 14.995 | 13.702 | 12.451 | 4.621  | NSE    | NSE    |
|          |      | MC test        | <0.001 | <0.001 | <0.001 | <0.001 |        |        |
|          |      | Fraction       | .465   | .442   |        | .857   |        |        |

NSE means that No Significant Excess of mutable motifs was found. The significance of the observed excess was measured using the Student *t*-test and Monte Carlo (MC) tests. The asterisk denotes that the corresponding  $P < 0.0005$  (critical value = 3.291) is a conservative estimate of the critical overall value of the *t*-test taking into account the Bonferroni correction for multiple testing ( $16 \times 6 = 96$ ). “Ratio” is the mean weight of mutated sites divided by the mean weight of non-mutated sites. The predicted fraction of mutations induced by AID/APOBEC proteins (“Fraction”) is shown when a significant excess of somatic mutations in a mutable motif comparisons was detected; all cases where there was a significant difference between observed and expected distributions ( $P > 0.05$ ) were discarded.

**Supplementary Table S8.** Correlation between AID/APOBEC mutable motifs and the context of C:G > A:T somatic mutations.

| Cancer tissue type | #Mutations | Test           | APO1   | APO3A  | APO3B  | APO3C  | APO3G  | AID    |
|--------------------|------------|----------------|--------|--------|--------|--------|--------|--------|
| Bladder            | 4603       | Ratio          | 1.295* | 1.259* | 1.291* | 1.088* | 1.045* | 1.020* |
|                    |            | <i>t</i> -test | 29.792 | 32.106 | 32.703 | 15.633 | 7.384  | 3.348  |
|                    |            | MC test        | <0.001 | <0.001 | <0.001 | <0.001 | <0.001 | <0.001 |
|                    |            | Fraction       | .522   |        | .490   | .116   | .892   | .444   |
| Blood              | 2207       | Ratio          | .883   | .938   | .926   | .990   | .937   | 1.068* |
|                    |            | <i>t</i> -test | NSE    | NSE    | NSE    | NSE    | NSE    | 7.287  |
|                    |            | MC test        |        |        |        |        |        | <0.001 |
|                    |            | Fraction       |        |        |        |        |        |        |
| Brain              | 4266       | Ratio          | .995   | .995   | 1.015  | 1.011  | 1.004  | 1.042* |
|                    |            | <i>t</i> -test | NSE    | NSE    | NSE    | NSE    | NSE    | 6.606  |
|                    |            | MC test        |        |        |        |        |        | <0.001 |
|                    |            | Fraction       |        |        |        |        |        |        |
| Breast             | 14962      | Ratio          | 1.146* | 1.124* | 1.152* | 1.046* | 1.015* | 1.019* |
|                    |            | <i>t</i> -test | 27.304 | 28.109 | 31.022 | 15.073 | 4.222  | 5.583  |
|                    |            | MC test        | <0.001 | <0.001 | <0.001 | <0.001 | <0.001 | <0.001 |
|                    |            | Fraction       | .411   | .361   |        | .122   | .831   |        |
| Cervix             | 5427       | Ratio          | 1.358* | 1.314* | 1.327* | 1.138* | 1.058* | 1.058* |
|                    |            | <i>t</i> -test | 40.229 | 43.802 | 41.438 | 26.786 | 10.963 | 11.523 |
|                    |            | MC test        | <0.001 | <0.001 | <0.001 | <0.001 | <0.001 | <0.001 |
|                    |            | Fraction       | .594   |        | .560   | .180   | .911   | .460   |
| Colon              | 36260      | Ratio          | 1.149* | 1.126* | 1.177* | 1.098* | 1.093* | 1.021* |
|                    |            | <i>t</i> -test | 44.656 | 48.604 | 62.061 | 48.784 | 42.269 | 9.439  |
|                    |            | MC test        | <0.001 | <0.001 | <0.001 | <0.001 | <0.001 | <0.001 |
|                    |            | Fraction       | .432   | .366   |        | .238   | .872   | .635   |
| Kidney             | 9825       | Ratio          | 1.071* | 1.063* | 1.099* | 1.036* | 1.041* | 1.007  |
|                    |            | <i>t</i> -test | 11.351 | 12.512 | 17.191 | 9.867  | 9.186  | NSE    |
|                    |            | MC test        | <0.001 | <0.001 | <0.001 | <0.001 | <0.001 |        |
|                    |            | Fraction       | .326   | .281   |        | .117   |        |        |
| Liver              | 23626      | Ratio          | 1.000  | 1.021* | 1.039* | 1.009* | .995   | 1.015* |
|                    |            | <i>t</i> -test | NSE    | 6.654  | 10.378 | 3.538  | NSE    | 5.391  |
|                    |            | MC test        |        | <0.001 | <0.001 | <0.001 |        | <0.001 |
|                    |            | Fraction       |        | .238   |        | .098   |        |        |
| Lung               | 90050      | Ratio          | .991   | 1.005* | 1.039* | .997   | 1.066* | .973   |
|                    |            | <i>t</i> -test | NSE    | 3.376  | 21.854 | NSE    | 42.629 | NSE    |
|                    |            | MC test        |        | .081   | <0.001 |        | <0.001 |        |
|                    |            | Fraction       |        | .199   |        |        |        |        |
| Ovary              | 5758       | Ratio          | .991   | .971   | .993   | .987   | .973   | 1.017  |
|                    |            | <i>t</i> -test | NSE    | NSE    | NSE    | NSE    | NSE    | 2.940  |
|                    |            | MC test        |        |        |        |        |        |        |
|                    |            | Fraction       |        |        |        |        |        |        |
| Pancreas           | 6195       | Ratio          | 1.054* | 1.038* | 1.065* | 1.026* | .990   | 1.015  |
|                    |            | <i>t</i> -test | 6.687  | 5.866  | 8.702  | 5.289  | NSE    | NSE    |
|                    |            | MC test        | <0.001 | <0.001 | <0.001 | <0.001 |        |        |
|                    |            | Fraction       | .337   |        |        | .113   |        |        |

|          |       |                |        |        |        |        |        |        |
|----------|-------|----------------|--------|--------|--------|--------|--------|--------|
| Prostate | 5810  | Ratio          | 1.018* | 1.075* | 1.070* | 1.052* | 1.362* | .941   |
|          |       | <i>t</i> -test | 2.715  | 14.553 | 12.186 | 12.186 | 53.228 | NSE    |
|          |       | MC test        | .018   | <0.001 | <0.001 | <0.001 | <0.001 |        |
|          |       | Fraction       | .143   | .483   |        | .680   |        |        |
| Rectum   | 7728  | Ratio          | 1.290* | 1.241* | 1.272* | 1.128* | 1.022* | 1.074* |
|          |       | <i>t</i> -test | 39.488 | 42.170 | 42.426 | 29.901 | 5.138  | 16.987 |
|          |       | MC test        | <0.001 | <0.001 | <0.001 | <0.001 | <0.001 | <0.001 |
|          |       | Fraction       | .577   | .509   | .542   | .294   | .043   | .708   |
| Skin     | 8242  | Ratio          | 1.145* | 1.142* | 1.189* | 1.103* | 1.252* | .969   |
|          |       | <i>t</i> -test | 22.752 | 28.022 | 35.087 | 25.986 | 48.166 | NSE    |
|          |       | MC test        | <0.001 | <0.001 | <0.001 | <0.001 | <0.001 |        |
|          |       | Fraction       | .322   | .239   | .253   | .114   |        |        |
| Stomach  | 17810 | Ratio          | .995   | .995   | 1.056* | 1.041* | 1.116* | .972   |
|          |       | <i>t</i> -test | NSE    | NSE    | 14.678 | 14.868 | 34.117 | NSE    |
|          |       | MC test        |        |        | <0.001 | <0.001 | <0.001 |        |
|          |       | Fraction       |        |        |        | .176   |        |        |
| Uterus   | 11903 | Ratio          | 1.160* | 1.136* | 1.169* | 1.106* | 1.085* | 1.059* |
|          |       | <i>t</i> -test | 28.320 | 30.494 | 34.360 | 31.664 | 22.785 | 16.397 |
|          |       | MC test        | <0.001 | <0.001 | <0.001 | <0.001 | <0.001 | <0.001 |
|          |       | Fraction       | .473   | .408   | .416   |        | .910   | .687   |

NSE means that No Significant Excess of mutable motifs was found. The significance of an excess was measured using the Student *t*-test and Monte Carlo (MC) tests. The asterisk denotes that the corresponding  $P < 0.0005$  (critical value = 3.291) is a conservative estimate of the critical overall value of the *t*-test taking into account the Bonferroni correction for multiple testing ( $16 \times 6 = 96$ ). “Ratio” is the mean weight of mutated sites divided by the mean weight of non-mutated sites. The predicted fraction of mutations induced by AID/APOBEC proteins (“Fraction”) is shown when a significant excess of somatic mutations in mutable motif comparisons was detected; all cases where there was a significant difference between observed and expected distributions ( $P > 0.05$ ) were discarded.

**Supplementary Figure S1. AID/APOBEC weight matrices W(b,j).**

| Position | -3<br>(3) | -2<br>(4) | -1<br>(5) | C<br>Mutation | +1<br>(7) | +2<br>(8) | +3<br>(9) |
|----------|-----------|-----------|-----------|---------------|-----------|-----------|-----------|
|----------|-----------|-----------|-----------|---------------|-----------|-----------|-----------|

**APOBEC1**

|   |        |       |        |   |       |       |       |
|---|--------|-------|--------|---|-------|-------|-------|
| A | -.857  | -.314 | -2.466 | - | .052  | .154  | .119  |
| T | 1.013  | .554  | 1.298  | - | .444  | .307  | .168  |
| G | -1.316 | -.820 | -4.361 | - | -.623 | -.381 | -.353 |
| C | -.779  | .074  | -2.571 | - | -.196 | -.260 | -.012 |

Smax = 5.148  
Smin = -9.409

**APOBEC3A**

|   |       |        |        |   |        |       |       |
|---|-------|--------|--------|---|--------|-------|-------|
| A | -.160 | -.050  | -2.615 | - | .476   | .243  | -.039 |
| T | .396  | .516   | 1.268  | - | -.090  | .256  | .219  |
| G | -.559 | -1.222 | -2.569 | - | .098   | -.258 | -.258 |
| C | .090  | .046   | -1.917 | - | -1.041 | -.454 | .040  |

Smax = 4.025  
Smin = -7.082

**APOBEC3B**

|   |       |       |        |   |       |       |       |
|---|-------|-------|--------|---|-------|-------|-------|
| A | -.032 | .261  | -2.799 | - | .400  | .261  | -.026 |
| T | .330  | .176  | 1.252  | - | .039  | .352  | .218  |
| G | -.401 | -.153 | -3.554 | - | -.229 | -.335 | -.273 |
| C | -.030 | -.456 | -1.294 | - | -.429 | -.655 | .039  |

Smax = 3.807  
Smin = -7.098

**APOBEC3C**

|   |       |        |       |   |       |        |       |
|---|-------|--------|-------|---|-------|--------|-------|
| A | .239  | -.499  | -.332 | - | .399  | .362   | .239  |
| T | .286  | 1.020  | .664  | - | .053  | .104   | .244  |
| G | -.473 | -1.390 | -.697 | - | -.003 | .114   | -.211 |
| C | -.293 | -1.392 | -.213 | - | -.832 | -1.169 | -.476 |

Smax = 3.914  
Smin = -7.233

**APOBEC3G**

|   |        |        |        |   |        |       |       |
|---|--------|--------|--------|---|--------|-------|-------|
| A | .290   | -.933  | -3.004 | - | .695   | .249  | .160  |
| T | .488   | .043   | -1.132 | - | -.193  | .188  | .225  |
| G | -.479  | -2.500 | -3.982 | - | -.254  | -.132 | -.349 |
| C | -1.071 | .954   | 1.349  | - | -1.093 | -.481 | -.151 |

Smax = 4.798  
Smin = -10.496

**AID**

|   |       |        |       |   |       |       |       |
|---|-------|--------|-------|---|-------|-------|-------|
| A | .404  | .774   | .391  | - | .141  | .027  | .072  |
| T | .012  | .218   | -.311 | - | .068  | .095  | .031  |
| G | -.321 | -2.734 | .342  | - | .119  | .007  | -.107 |
| C | -.294 | -.944  | -.917 | - | -.401 | -.109 | .026  |

Smax = 2.347  
Smin = -5.001

**Supplementary Figure S2.** The overall distribution of fraction of somatic C:G > T:A mutations associated with AID/APOBEC deamination (APOBEC1, APOBEC3A, APOBEC3B and AID deaminases).

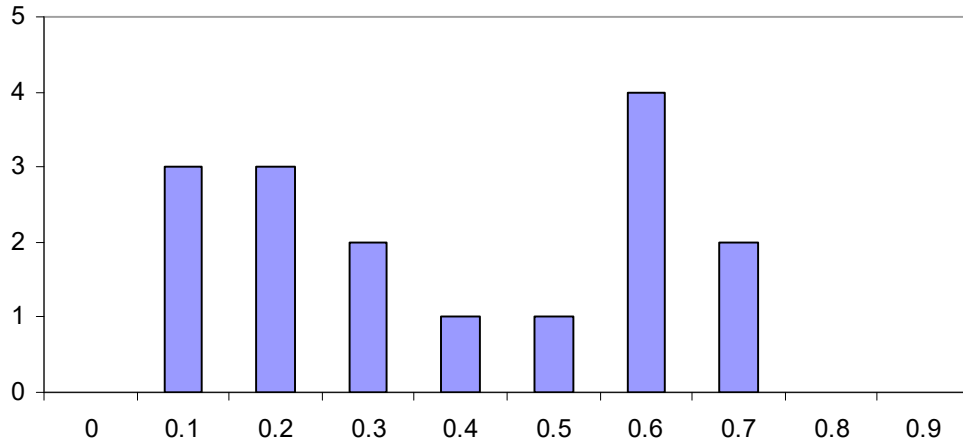

Supplement: cancers-11-00211-s001.pdf [file cancers-11-00211-s001.pdf]
